# Supplementary material for: Genome-Wide Identification of Catalase Gene Family and the Function of SmCAT4 in Eggplant Response to Salt Stress
Source: MDPI journal article supplement (doi:10.3390/ijms242316979), 2023-11-30
Supplement: s1 [file s1]

## Supplementary Materials

**Table S1.** Sequences of primer pairs were used in this study.

| Primer Name             | Forward (5' to 3')         | Reserves (5' to 3')         |                          |
|-------------------------|----------------------------|-----------------------------|--------------------------|
| <i>SmCAT1</i>           | CTCTTACAGTTGCCATCGGACAAGG  | GGGTCAAGTGAGCGTTAGCATAGTC   | RT-qPCR                  |
| <i>SmCAT2</i>           | TCTCAGACTCTTGGAGCCCATTAGG  | CTGCCAGGGTGAAAGGGAACATC     | RT-qPCR                  |
| <i>SmCAT3</i>           | AGGTCACTGGTGGTCCGACTATTG   | CATCTGGTAACCGCCCTTCCTTTG    | RT-qPCR                  |
| <i>SmCAT4</i>           | GCTTGCTGGAGTTGTTGCTGTTG    | CGCCCTTCTTCTGGTGAGTTTGATG   | RT-qPCR                  |
| <i>SmActin</i>          | CACTTAGCACCTTCCAGCAGATGT   | GTACAACAGCAGACCTGAGTTCCT    | RT-qPCR                  |
| <i>SmTAS14</i>          | GGACAGCAGGAAGGTGGATA       | TCATTCCAGGGATCTTGTCC        | RT-qPCR                  |
| <i>SmDHN1</i>           | CAACTCATGCTGCACAAACA       | CAATTCATGCCAGGGATCTT        | RT-qPCR                  |
| <i>SmCAT1</i> -pBinGFP2 | CTGTACAAGGGTACCCCCGGGATG   | AGAGGATCCGTCGACCCCCGGGT     | Subcellular localization |
| <i>SmCAT2</i> -pBinGFP2 | GATCTCTCTAAGTATCGCCCT      | CACATTGTAGGCTTGACAGTGAGA    | Subcellular localization |
| <i>SmCAT3</i> -pBinGFP2 | CTGTACAAGGGTACCCCCGGGATG   | AGAGGATCCGTCGACCCCCGGGTCAT  | Subcellular localization |
| <i>SmCAT4</i> -pBinGFP2 | GATCCTTACAAGTATCGCCC       | ATTGTTGGTCTCACATTAAGC       | Subcellular localization |
| <i>SmCAT4-GST</i>       | CTGTACAAGGGTACCCCCGGGATG   | AGAGGATCCGTCGACCCCCGGGTCAC  | Prokaryotic expression   |
| <i>SmCAT4</i> -VIGS     | GAGTATCGCCCTTCAAGC         | TTATAGCAGGCTTCATAGTGA       | VIGS                     |
|                         | GGGGACAAGTTTGTACAAAAAAGCA  | GGGGACCACTTTGTACAAGAAAGCTGG |                          |
|                         | GGCTTCAGATGAGAATGGTTGGAATG | GTCGTTTCAAGATCAAAGCTAAA     |                          |
